# Supplementary material for: Rickettsial Infections and Q Fever Amongst Febrile Patients in Bhutan
Source: MDPI journal article supplement (doi:10.3390/tropicalmed3010012), 2018-01-25
Supplement: s1 [file s1]

**Supplementary table 1:** Monthly cases of SFG, TG, STG and QF with corresponding average month temperature and rainfall of Bhutan

| Months | SFG | TG | STG | QF | Temperature (C) | Rainfall (mm) |
|--------|-----|----|-----|----|-----------------|---------------|
| Oct-14 | 13  | 2  | 30  | 3  | 18              | 53            |
| Nov-14 | 5   | 3  | 11  | 6  | 13              | 10            |
| Dec-14 | 4   | 0  | 4   | 3  | 10              | 4             |
| Jan-15 | 4   | 2  | 2   | 3  | 8               | 11            |
| Feb-15 | 3   | 2  | 5   | 2  | 10              | 26            |
| Mar-15 | 5   | 0  | 4   | 3  | 13              | 26            |
| Apr-15 | 5   | 1  | 3   | 3  | 16              | 56            |
| May-15 | 8   | 1  | 6   | 2  | 19              | 103           |
| Jun-15 | 9   | 3  | 5   | 4  | 21              | 182           |

SFG: Spotted fever group; TG: Typhus group; STG: Scrub typhus group; QF: Q fever; C: degree Celsius; mm: millimeter
